# Supplementary material
Source: Copernicus journal article supplement (doi:10.5194/acp-26-6799-2026)
Supplement: Supplementary file 1 [file acp-26-6799-2026-supplement.pdf]

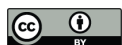

*Supplement of*

## **Contrasting organic aerosol molecular composition between the urban and agricultural environment of the Po Valley**

**Luca D'Angelo et al.**

*Correspondence to:* Luca D'Angelo ([l.dangelo@arpalombardia.it](mailto:l.dangelo@arpalombardia.it)) and Alexander L. Vogel ([vogel@iau.uni-frankfurt.de](mailto:vogel@iau.uni-frankfurt.de))

The copyright of individual parts of the supplement might differ from the article licence.

## Contents

|    |                                                          |           |
|----|----------------------------------------------------------|-----------|
|    | <b>S1 Calculations</b>                                   | <b>1</b>  |
|    | S1.1 Normalized-Signal Intensity (nSI)                   | 1         |
|    | S1.2 Residuals contribution calculation                  | 1         |
| 5  | <b>S2 Supplement figures</b>                             | <b>3</b>  |
|    | S2.1 Map of North of Italy                               | 3         |
|    | S2.2 Brown carbon-related compounds                      | 4         |
|    | S2.3 Time serie of confirmed compounds                   | 7         |
|    | S2.4 Clustergrams                                        | 8         |
| 10 | S2.5 Clusters molecular fingerprints                     | 10        |
|    | S2.5.1 Clusters molecular fingerprints - MI site         | 10        |
|    | S2.5.2 Clusters molecular fingerprints - SKI site        | 14        |
|    | S2.6 Site-specific compound fingerprints                 | 17        |
|    | S2.7 Occurrence of similar samples                       | 19        |
| 15 | S2.8 Fingerprint of potential BrC features               | 20        |
|    | S2.9 Attribution of potential BrC features at both sites | 22        |
|    | S2.10 Aerosol Ångstrom Exponent for pair samples         | 22        |
|    | <b>S3 Compound Discoverer workflows</b>                  | <b>24</b> |

## S1 Calculations

### 20 S1.1 Normalized-Signal Intensity (nSI)

In order to take into account the ionization efficiency and ion transmission variability between positive and negative ionization mode and to compare the time serie, we choose to scale the signal intensity of each individual compound detected in each sample by the maximum signal intensity detected over the whole time serie taking into account the ionization mode.

Let us call  $SI_{c,pol,d}$  the signal intensity of compound  $c$  detected in polarization mode  $pol$  on a sample collected on day  $d$  and let us call  $MAX(SI_{pol})$  the maximum SI within the entire dataset detected in  $pol$ . Then:

$$nSI_{c,d} = \frac{SI_{c,pol,d}}{MAX(SI_{pol})} \quad (S1)$$

As a consequence, the normalized-Total Signal Intensity ( $nTSI$ ) of the sample collected on day  $d$  is:

$$nTSI_d = \sum_{c=1}^C nSI \quad (S2)$$

### 30 S1.2 Residuals contribution calculation

Let us indicate  $nSI_{MI,c,d}$  the normalized signal intensity (nSI) for compound  $c$  detected by the HPLC-HESI-HRMS system on the  $PM_{2.5}$  sample collected at Milan (MI) on day  $d$ . Similarly,  $nSI_{SKI,c,d}$  is the nSI for compound  $c$  detected on the sample collected on the same day  $d$  at Schivenoglia (SKI).

Then:

$$35 \text{ Residuals}_{c,d} = nSI_{MI,c,d} - nSI_{SKI,c,d} \quad (S3)$$

Positive *Residuals* means that  $nSI_{c,d}$  is higher at MI, whereas negative *Residuals* indicates higher  $nSI_{c,d}$  at SKI.

To evaluate the relative contribution amount of compound  $c$  detected with higher intensity at the site where it is higher (*site*) to the nTSI on day  $d$ , we calculate:

$$40 \quad Contribution = \frac{Residuals_{c,d}}{nTSI_{site,d}} \times 100 \quad (S4)$$

## S2 Supplement figures

### S2.1 Map of North of Italy

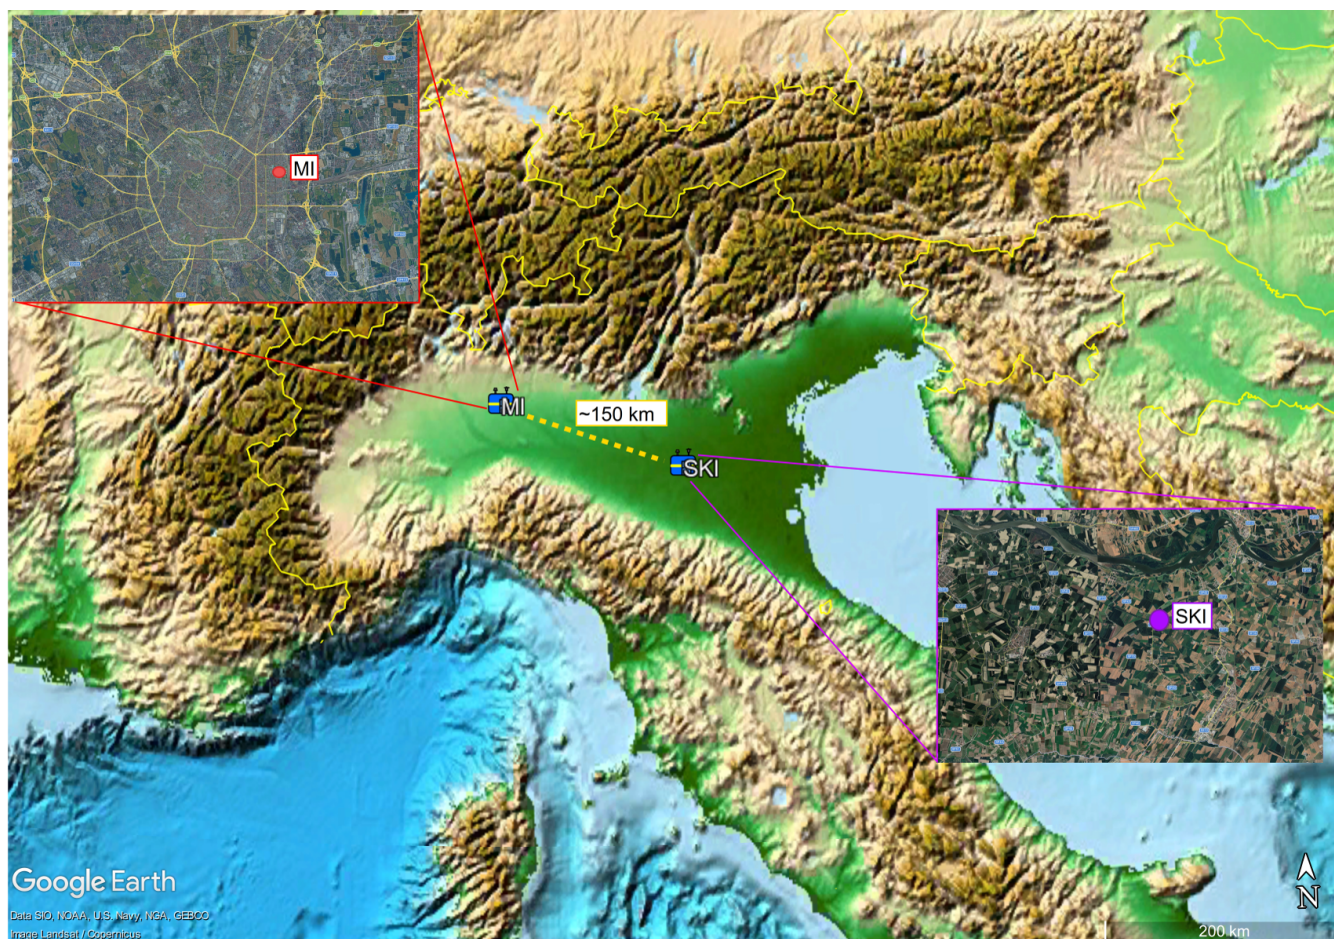

**Figure S1.** Map of Northern Italy. The Po Valley area is clearly visible, including the orography that often prevent incoming air masses able to abate the high aerosol concentrations that affect the basin. In the map the location of the two sampling sites considered in this work are also shown: MI (the urban background site) and SKI (the rural–agricultural background site). Layer background: ©Google Earth using imagery by Landsat/Copernicus. Topography dat set used by ETOPO1 1 Arc-Minute Global Relief Model (Amante and Eakins, 2009), NOAA National Geophysical Data Center.

## S2.2 Brown carbon-related compounds

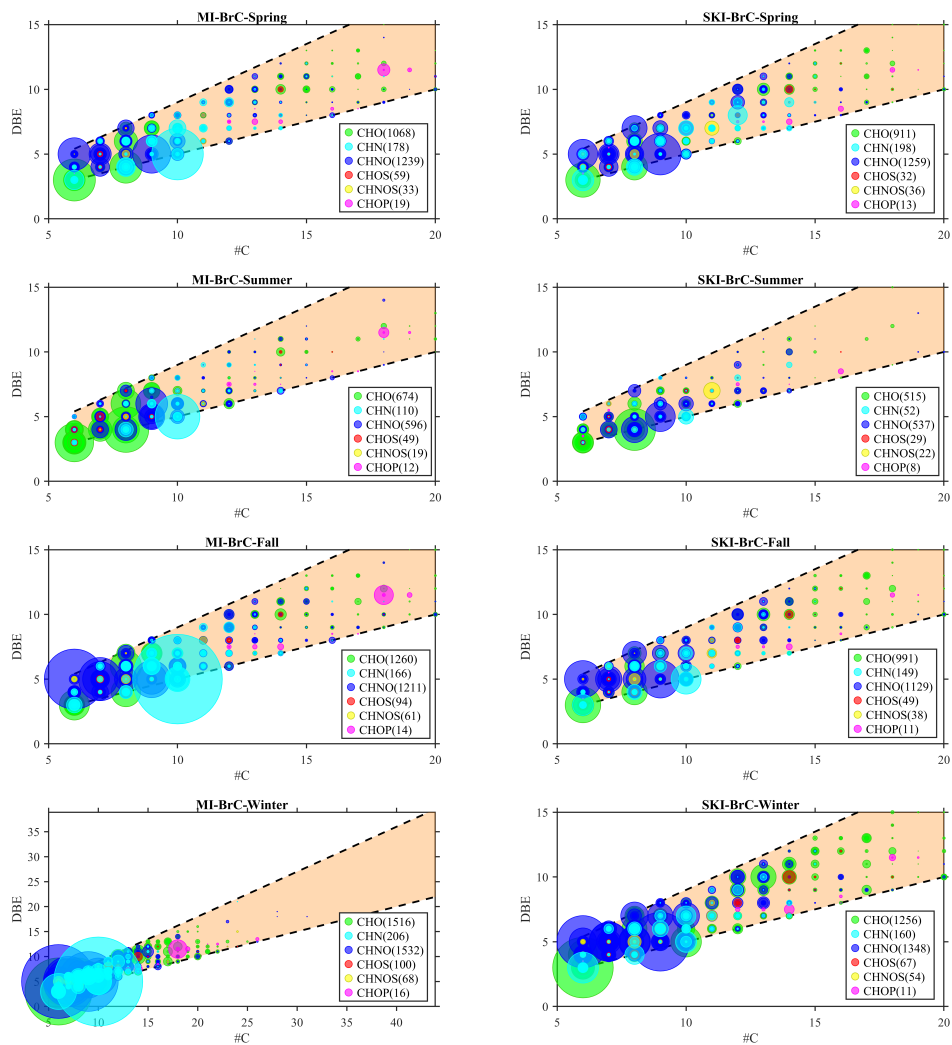

**Figure S2.** Seasonal fingerprints of BrC-related compounds for MI (left) and SKI (right) sites. The plots highlight the molecular variability between the two environments over the seasons.

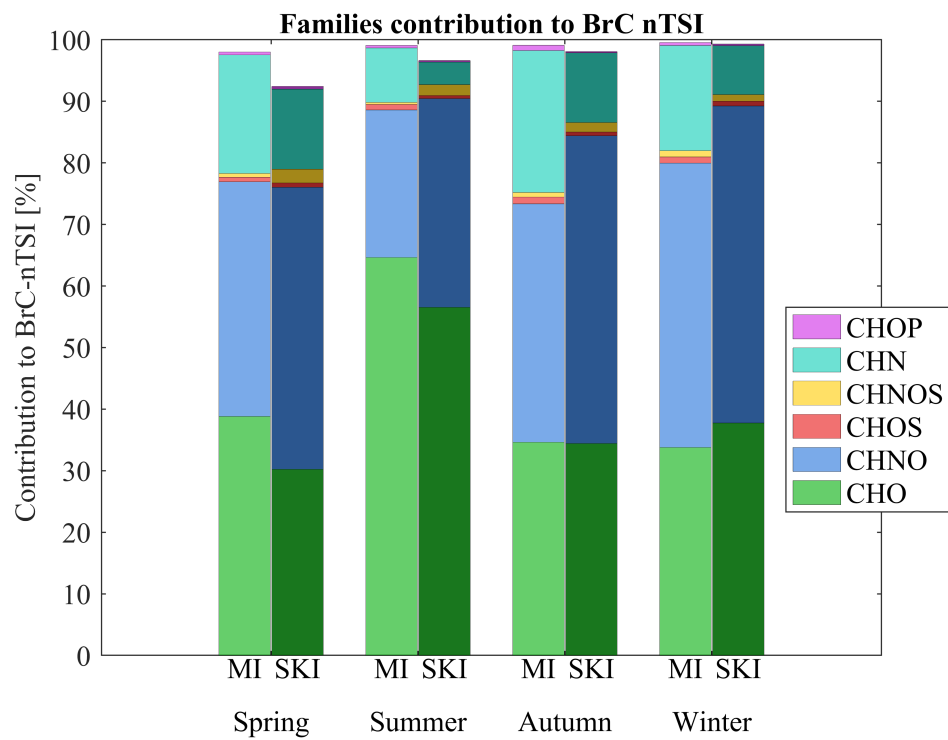

**Figure S3.** Contribution of the compound families related to BrC nTSI. The residual contribution (not shown) is due to compounds belonging to the "Other" group.

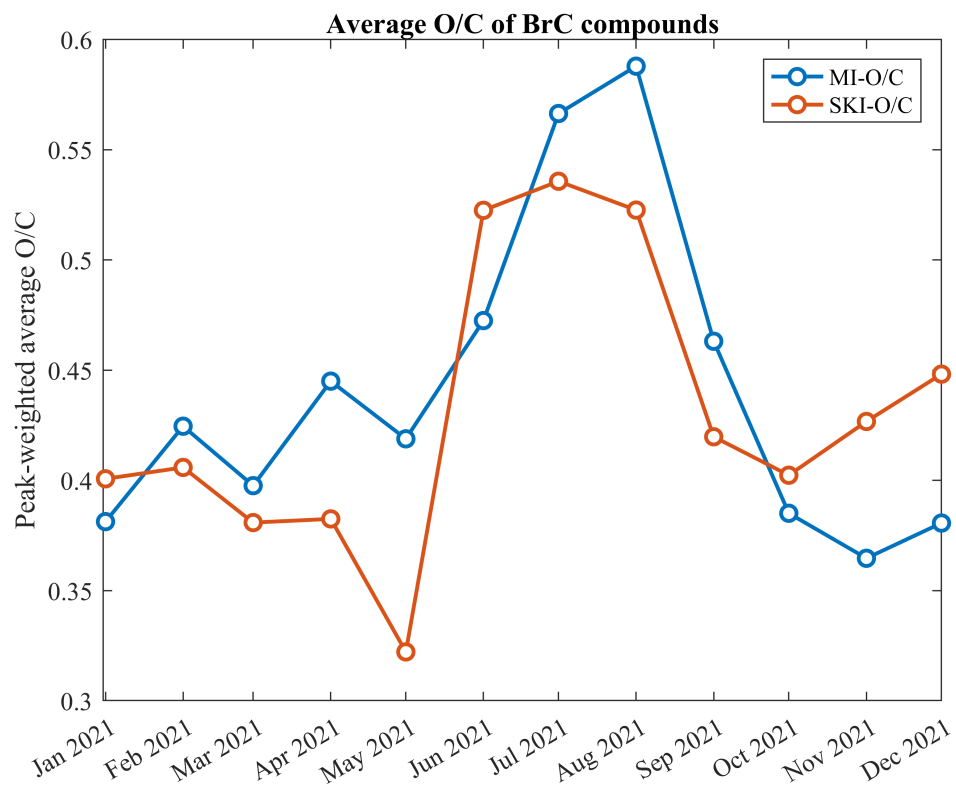

**Figure S4.** Peak-weighted average of O/C for BrC-related compounds. The monthly average suggests a stronger oxidation regime during summer.

### S2.3 Time serie of confirmed compounds

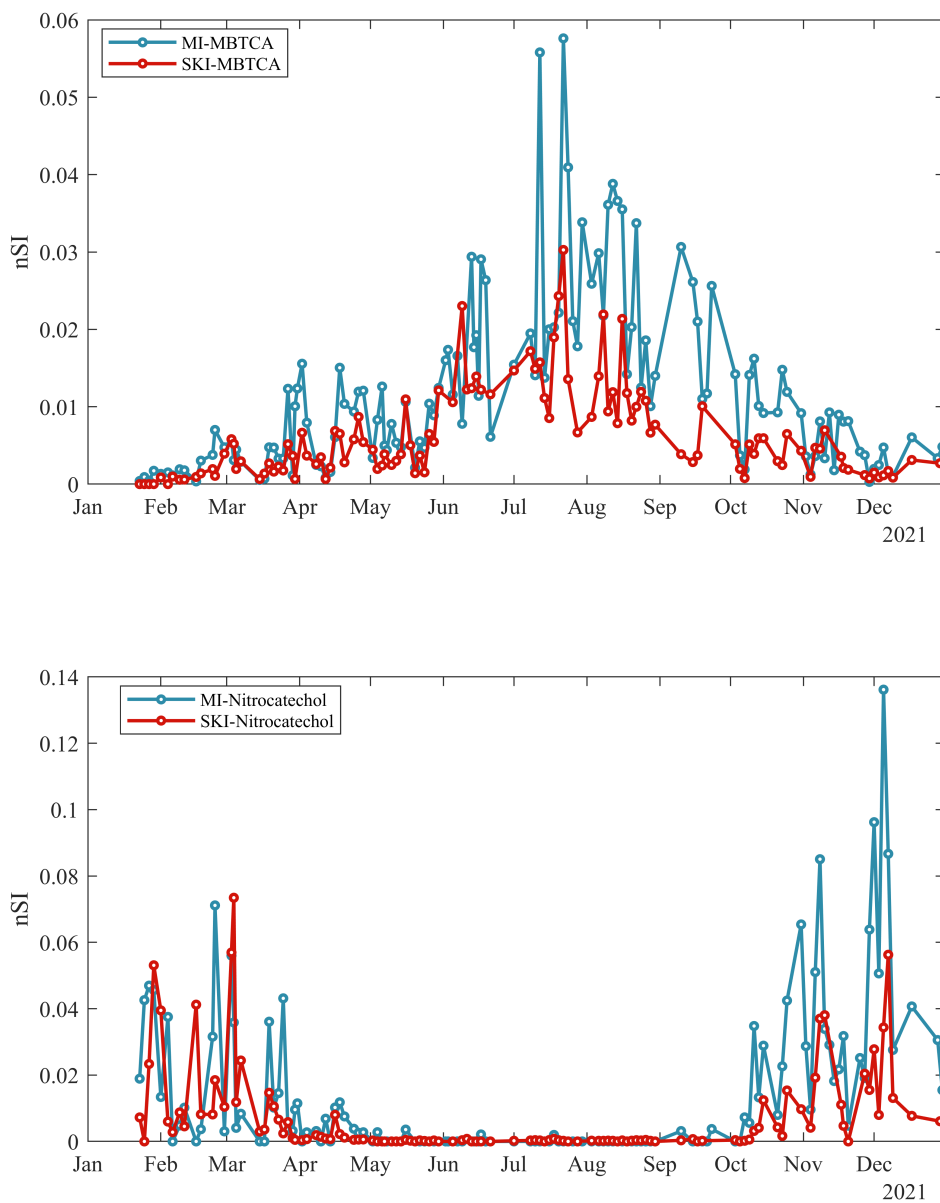

**Figure S5.** Time series of L1 identification confidence compounds for biogenic (MBTCA, upper plot) and anthropogenic (nitrocatechol, lower plot) SOA at MI and SKI sites.

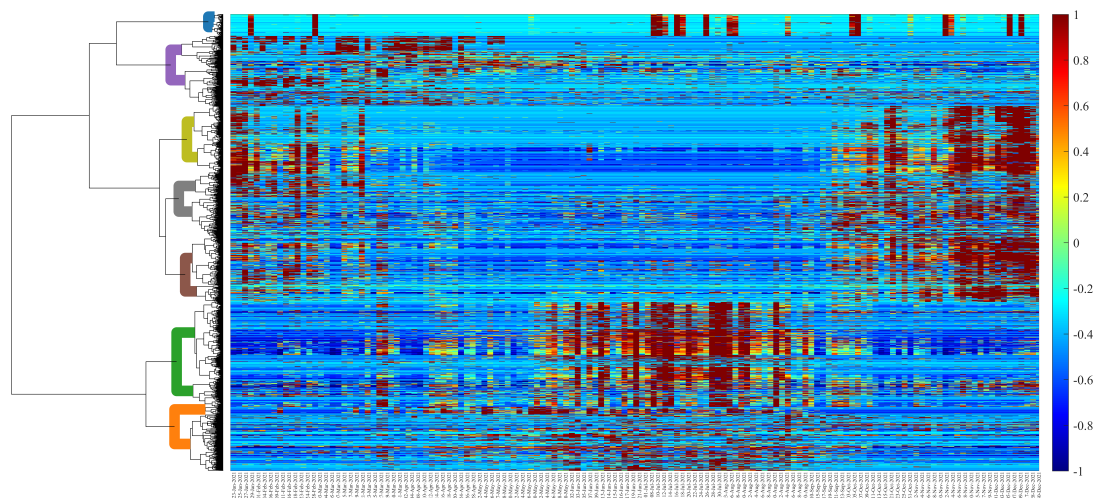

**Figure S6.** Graphic result of the hierarchical clustering performed on MI dataset. Warmer colors indicate higher values after standardization over the time series of each individual compound. The assigned clusters are marked with the same colors showed in Figure 3 in the main text.

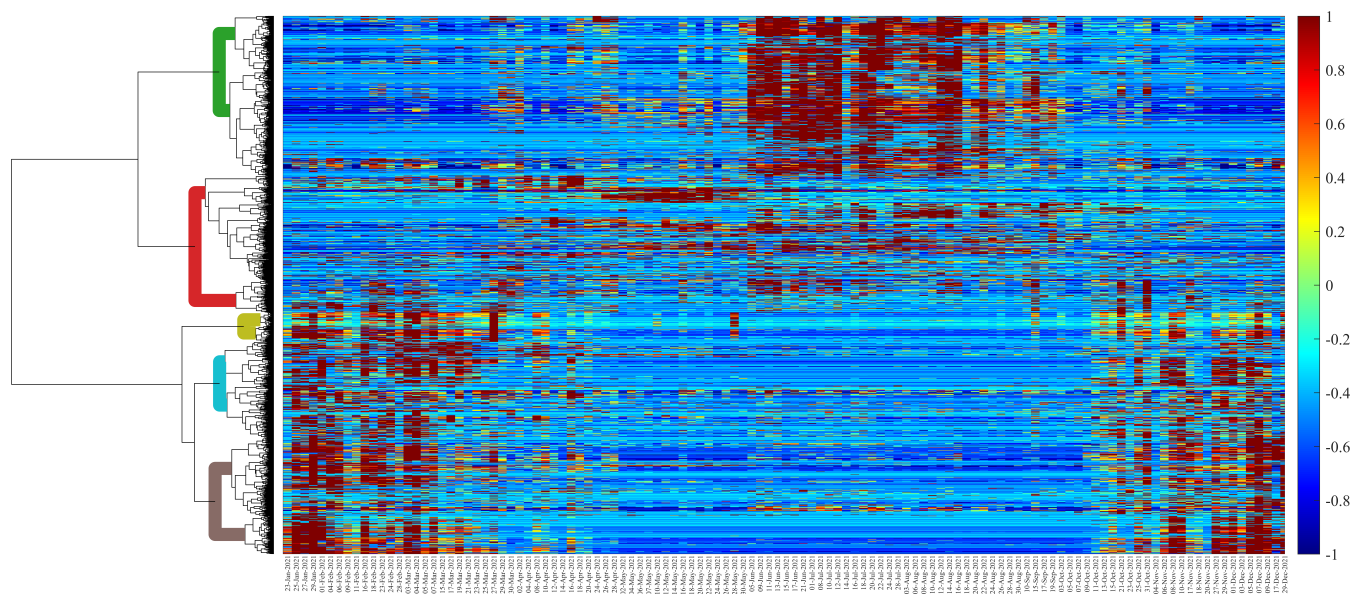

**Figure S7.** Graphic result of the hierarchical clustering performed on SKI dataset. Warmer colors indicate higher values after standardization over the time series of each individual compound. The assigned clusters are marked with the same colors showed in Figure 3 in the main text.

## S2.5 Clusters molecular fingerprints

50 In this section we show the molecular fingerprint of each cluster. We chose to graphically described the clusters' characteristics based on their retention time (a proxy for the polarity of the molecules) against their calculated molecular weight (left plots), their H/C ratio against O/C ratio with the Van Krevelen diagram (center) and their average  $OS_C$  against the number of carbon in the Kroll plot (right). Within these plots, each feature is colored based on the molecular class and the size of the bullet is proportional to its nSI considering as null value all SI below the threshold after blank correction.

### S2.5.1 Clusters molecular fingerprints - MI site

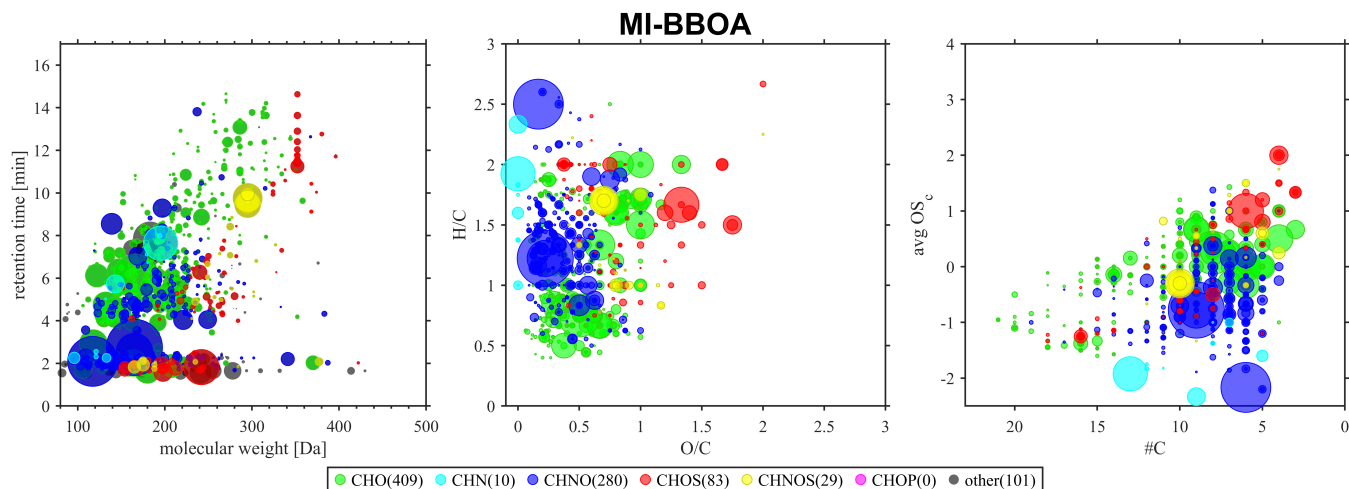

**Figure S8.** Molecular fingerprint of biomass burning organic aerosols at MI (MI-BBOA).

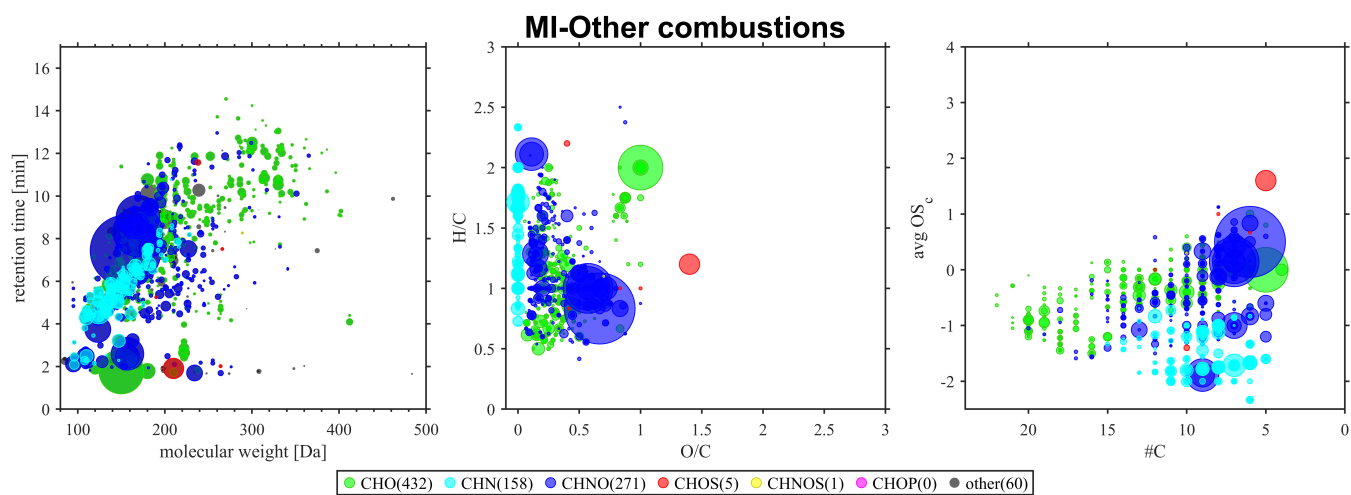

**Figure S9.** Molecular fingerprint of other combustion related features at MI (MI-Other combustion).

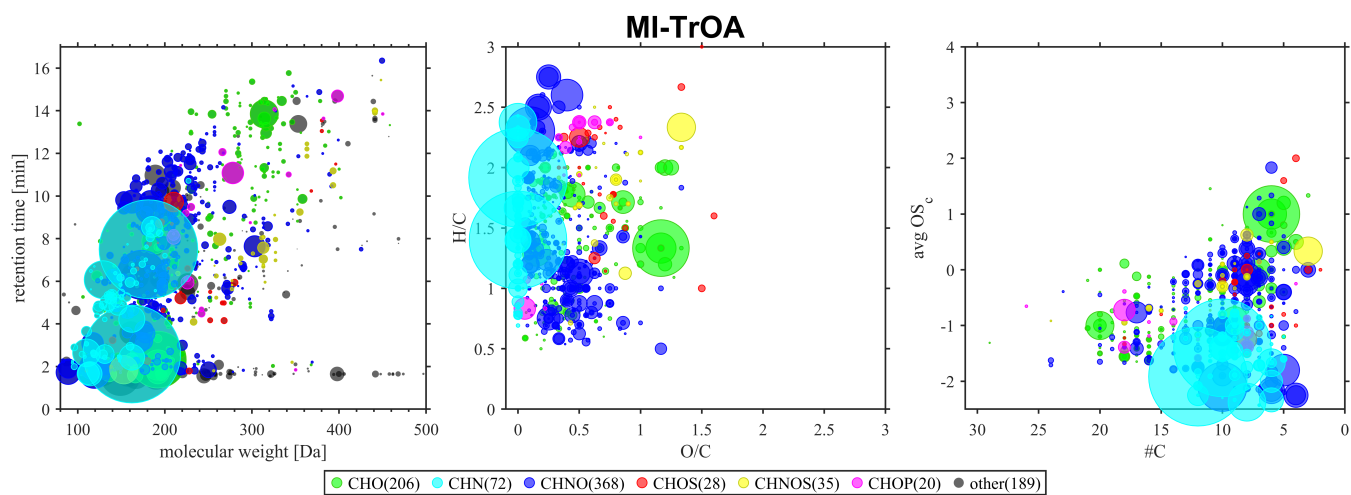

**Figure S10.** Molecular fingerprint of traffic organic aerosols at MI (MI-TrOA).

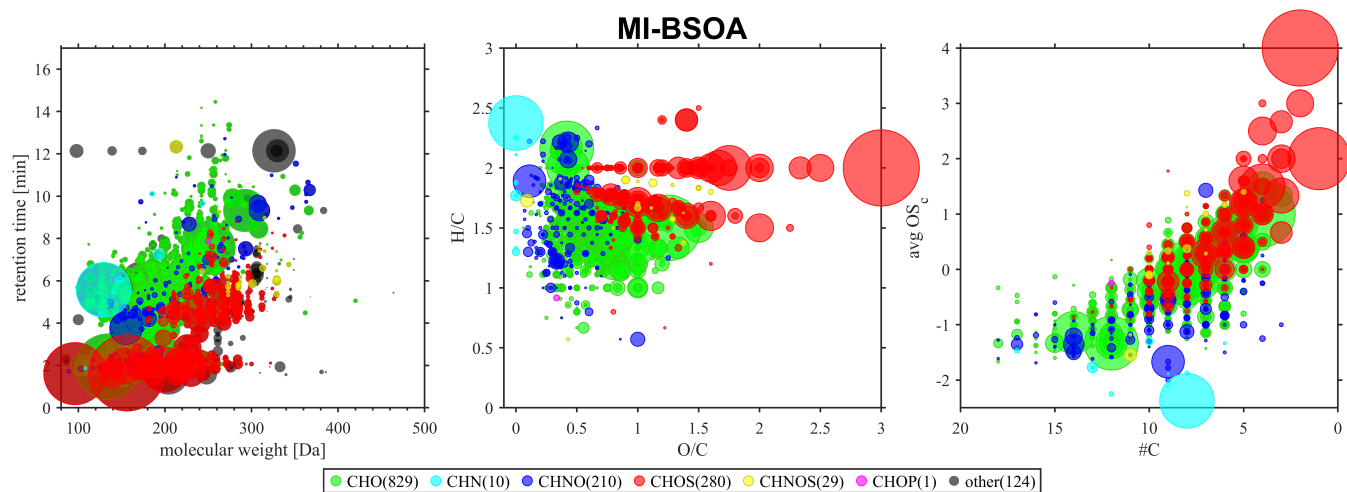

**Figure S11.** Molecular fingerprint of biogenic organic aerosols at MI (MI-BSOA).

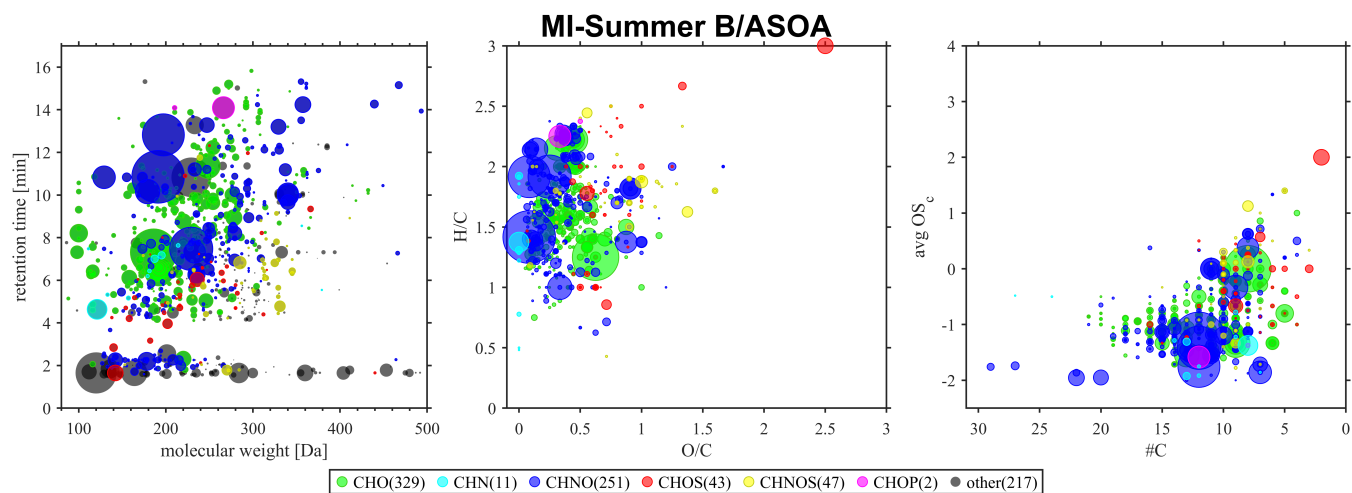

**Figure S12.** Molecular fingerprint of summertime mixed biogenic and anthropogenic aerosols at MI (MI-Summer B/ASOA).

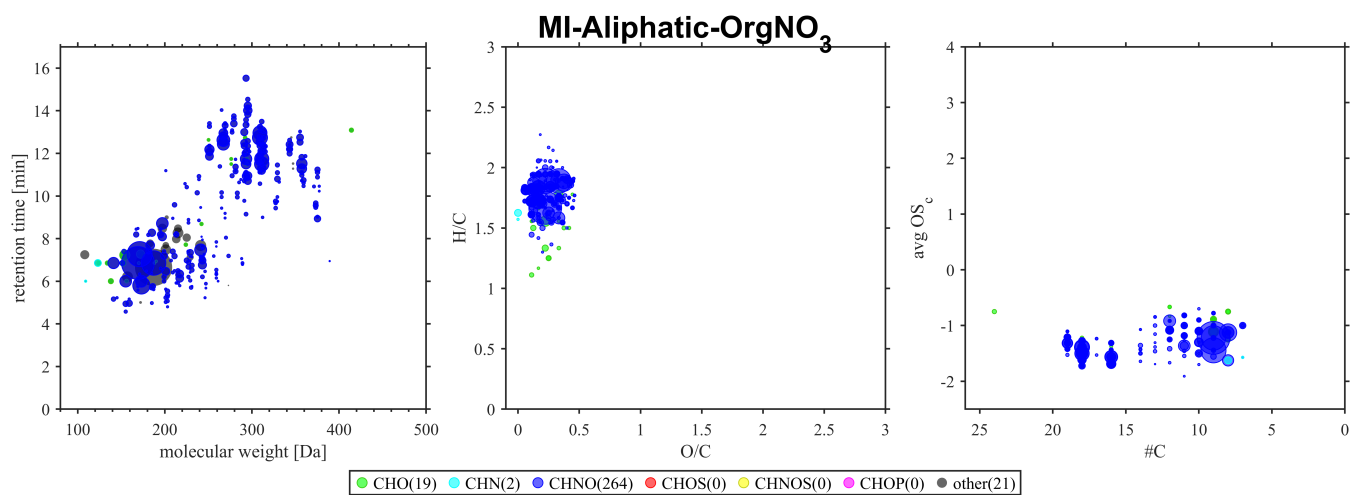

**Figure S13.** Molecular fingerprint of aliphatic organo-nitrate aerosols at MI (MI-OrgNO<sub>3</sub>).

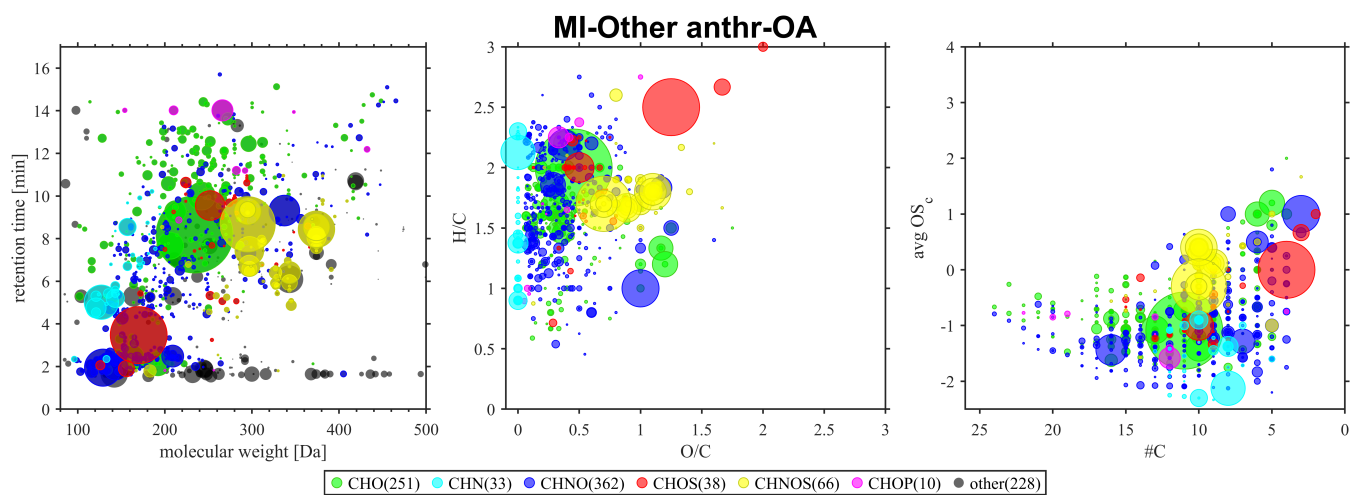

**Figure S14.** Molecular fingerprint of other anthropogenic organic aerosols at MI (MI-Other anthr-OA).

## S2.5.2 Clusters molecular fingerprints - SKI site

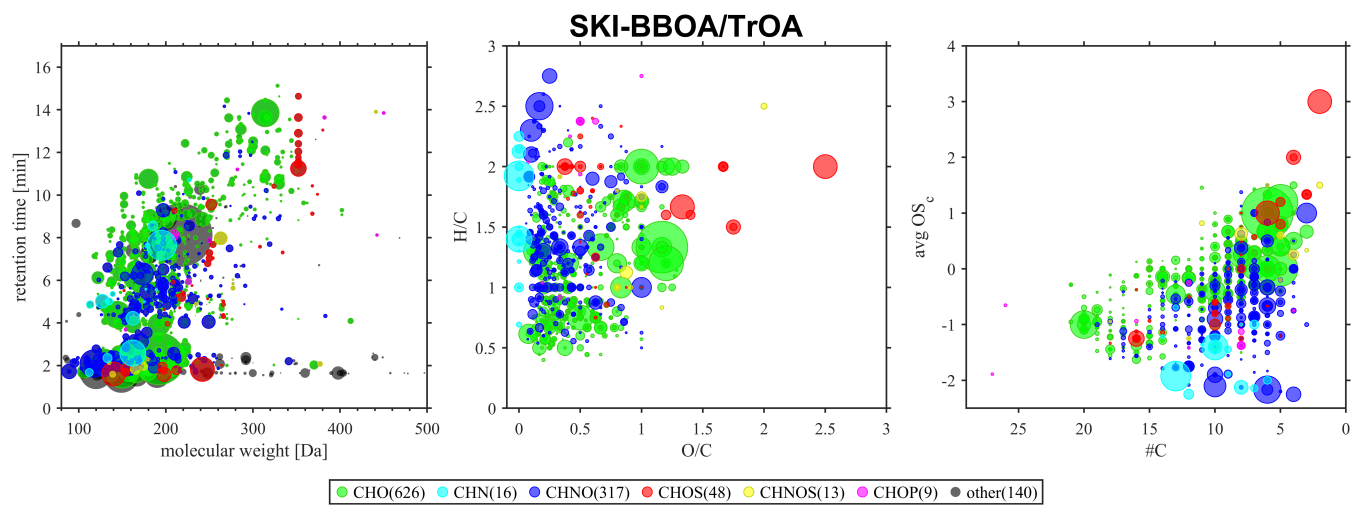

**Figure S15.** Molecular fingerprint of mixed biomass burning and traffic related organic aerosols at SKI (SKI-BBOA/TrOA).

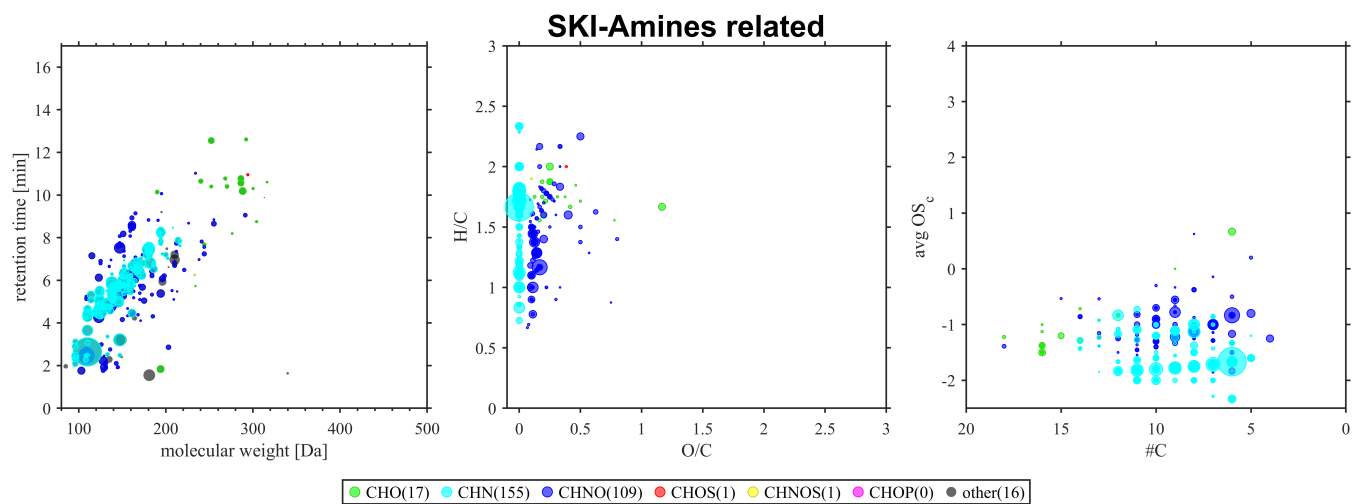

**Figure S16.** Molecular fingerprint of amines related organic aerosols at SKI (SKI-Amines related).

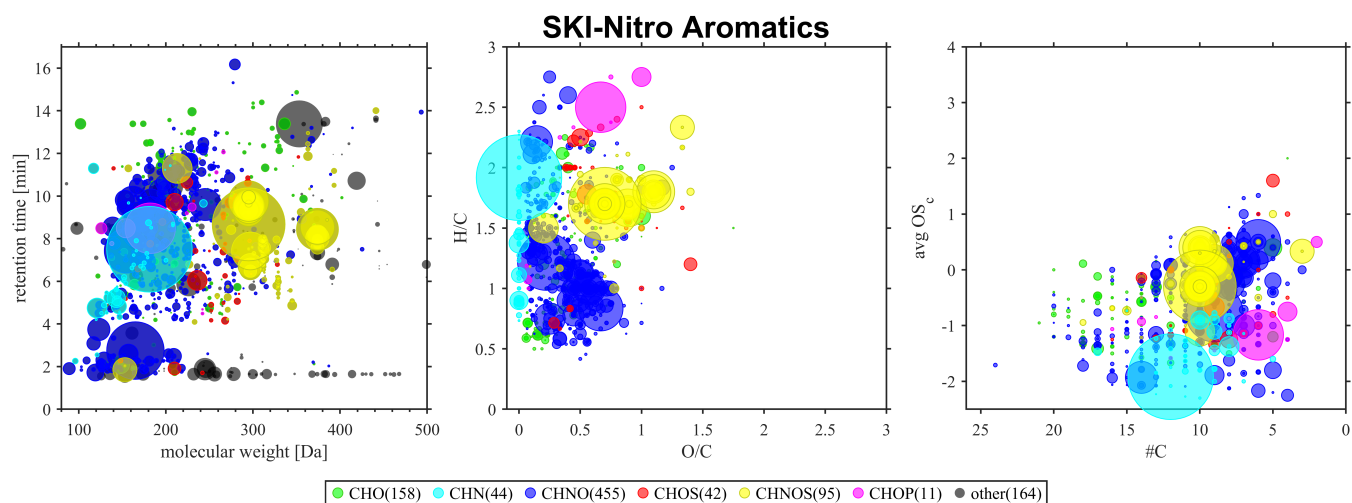

**Figure S17.** Molecular fingerprint of nitro-aromatic related organic aerosols at SKI (SKI-Nitro Aromatics).

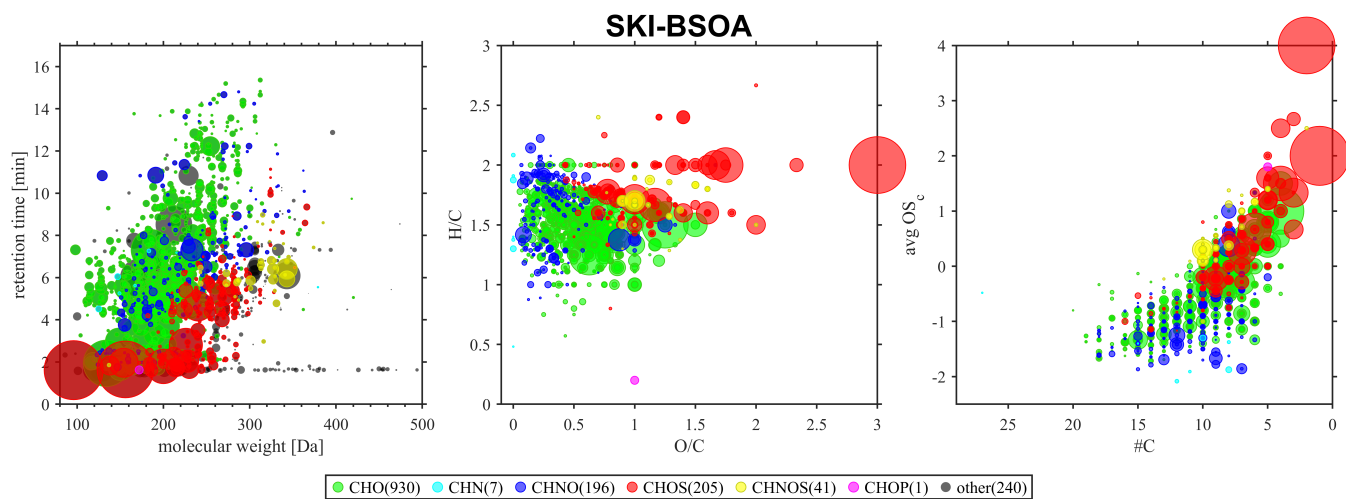

**Figure S18.** Molecular fingerprint of biogenic organic aerosols at SKI (SKI-BSOA).

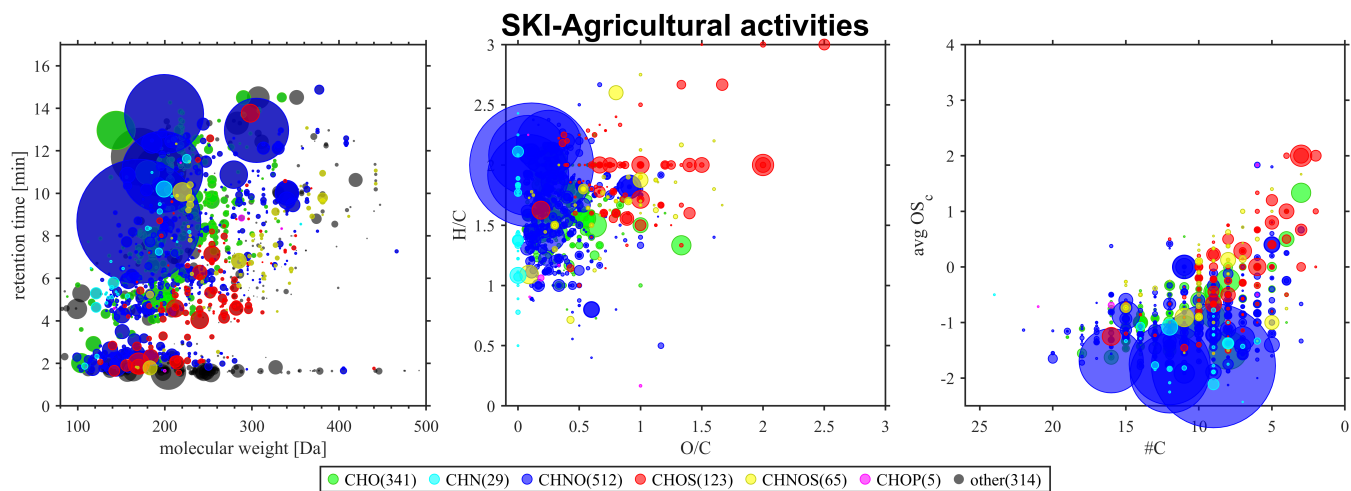

**Figure S19.** Molecular fingerprint of features linked to agricultural activities at SKI (SKI-Agricultural activities).

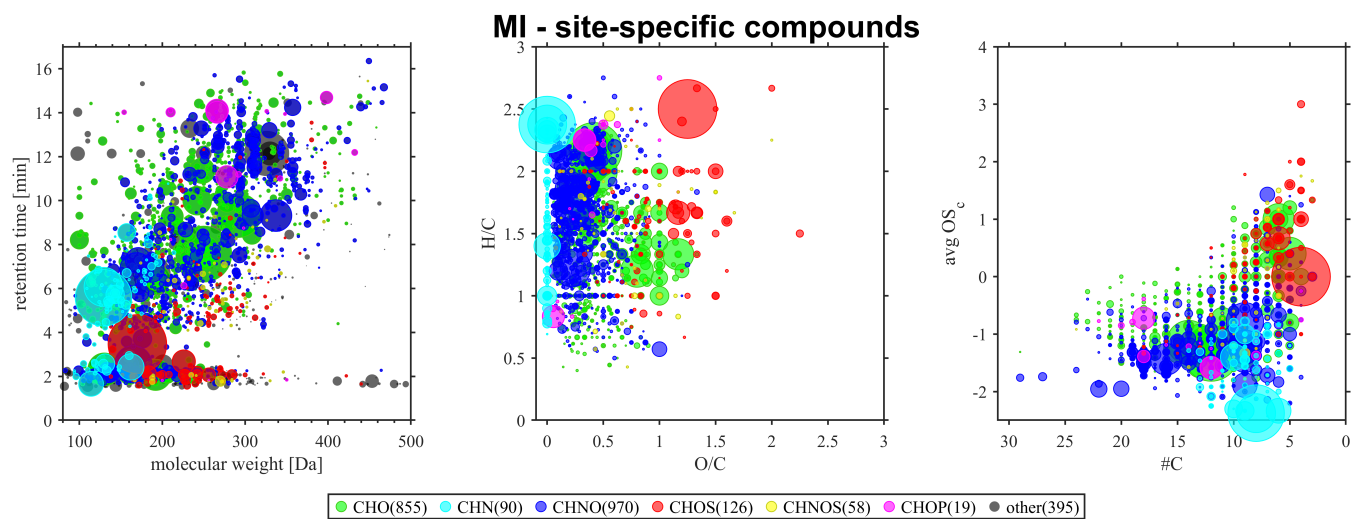

**Figure S20.** Molecular fingerprint of site-specific compounds detected at MI site and classified with the HCA.

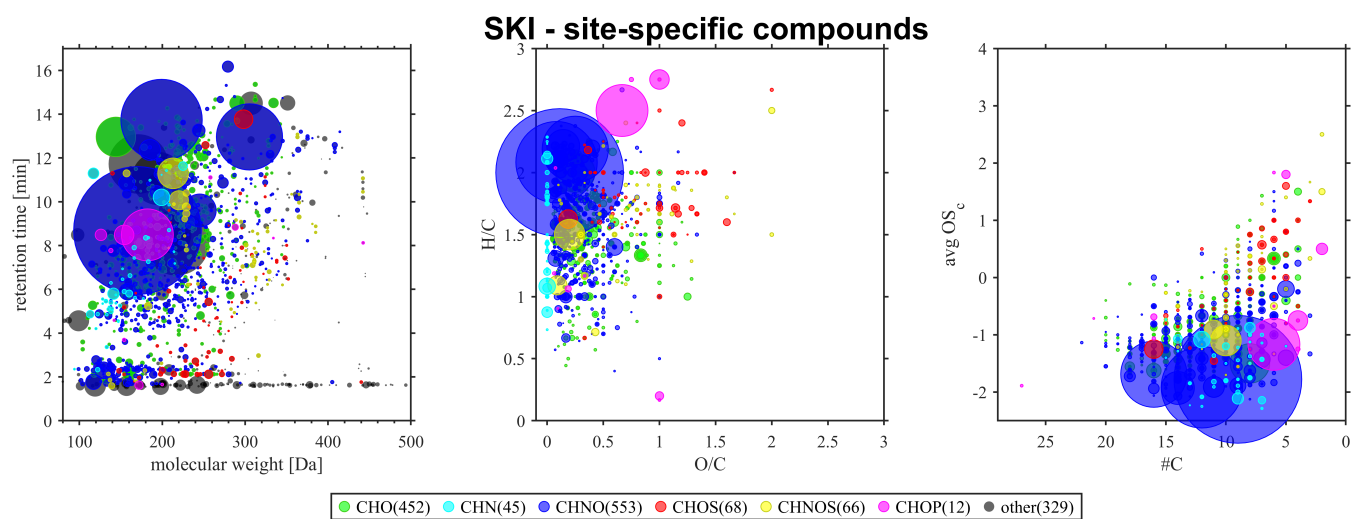

**Figure S21.** Molecular fingerprint of site-specific compounds detected at SKI site and classified with the HCA.

## S2.7 Occurrence of similar samples

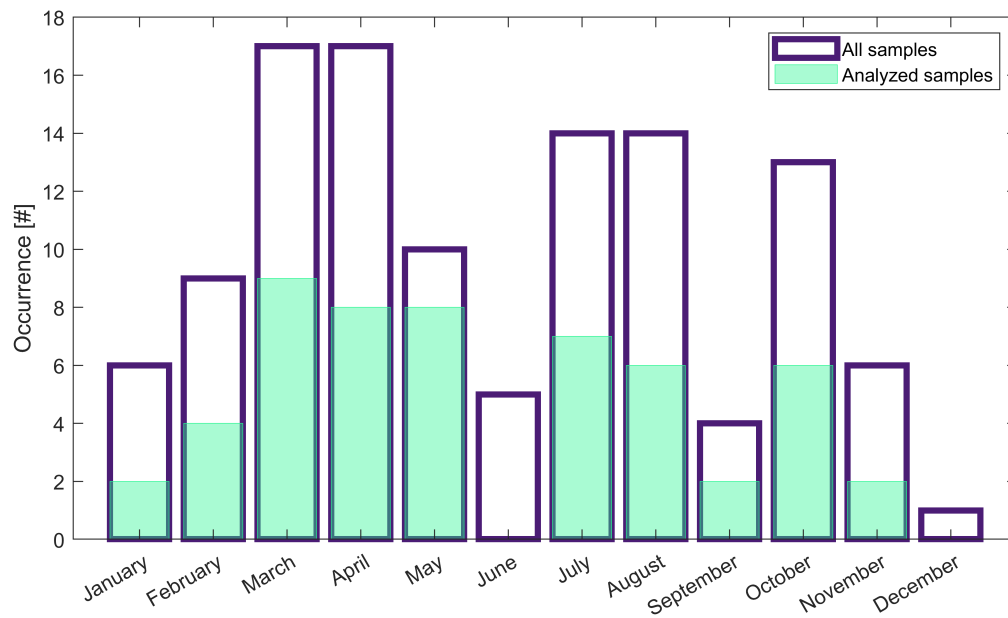

**Figure S22.** Frequency histogram of samples (collected on the same day in 2021) that meet the criteria to be defined as ‘similar samples,’ grouped by month. The blue bars represent the entire dataset of samples collected throughout the year, whereas the red bars indicate the pairs of samples that were actually extracted and analyzed in this study.

## S2.8 Fingerprint of potential BrC features

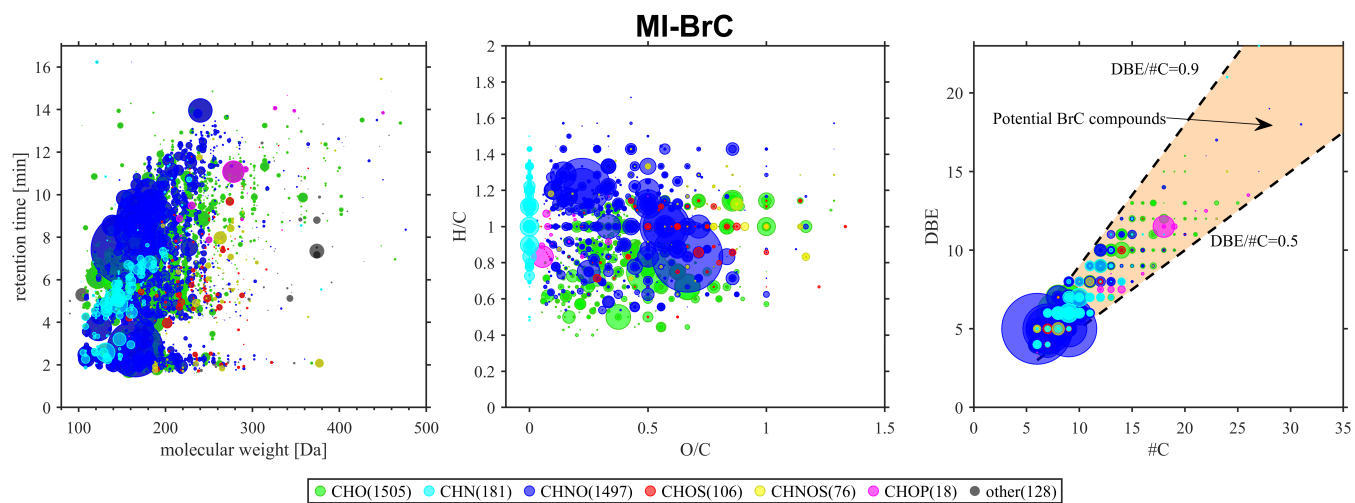

**Figure S23.** Molecular fingerprints of potential BrC-related compounds detected and classified at MI site.

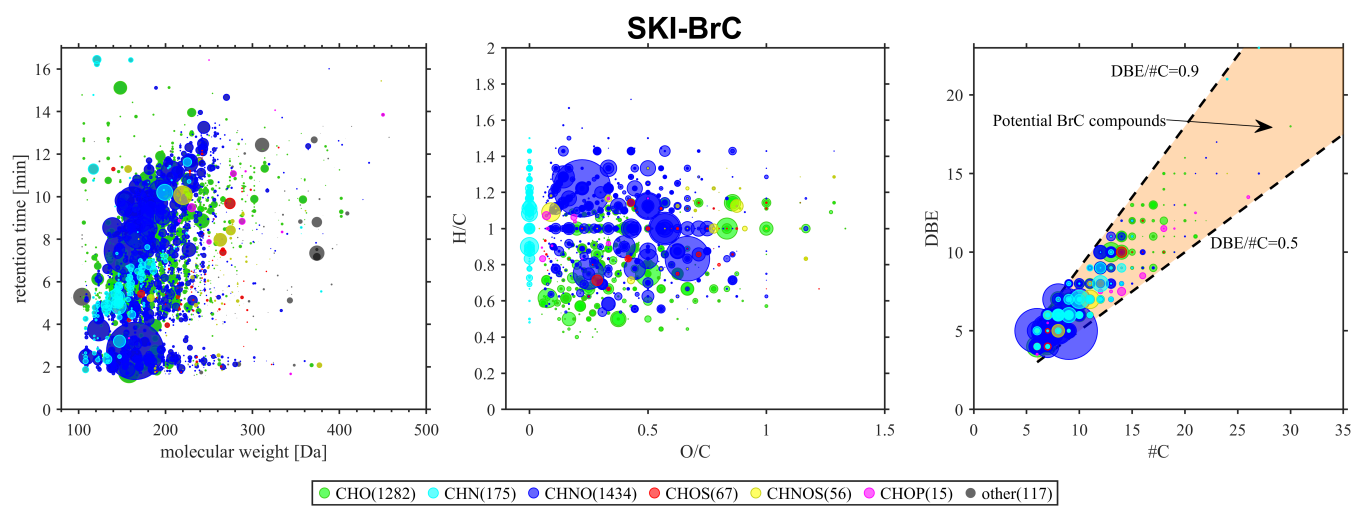

**Figure S24.** Molecular fingerprints of potential BrC-related compounds detected and classified at SKI site.

## S2.9 Attribution of potential BrC features at both sites

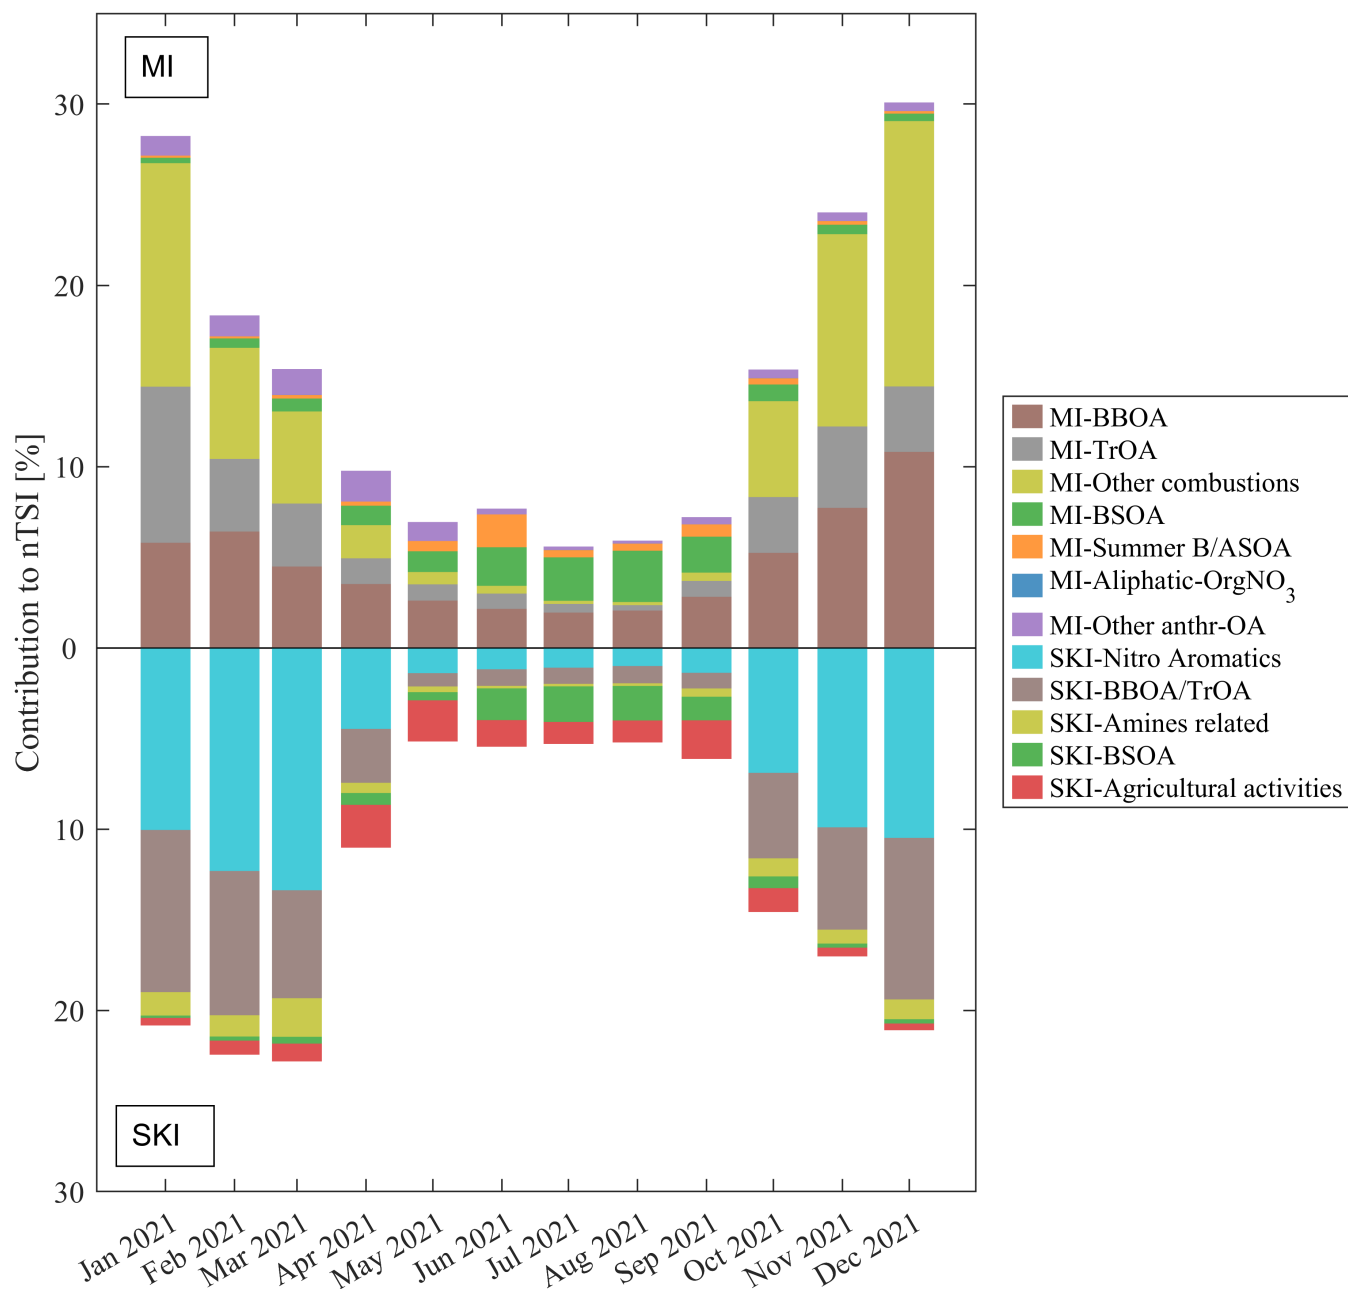

Figure S25. Contribution to nTSI due to features identified as potential BrC-related compounds.

## S2.10 Aerosol Ångstrom Exponent for pair samples

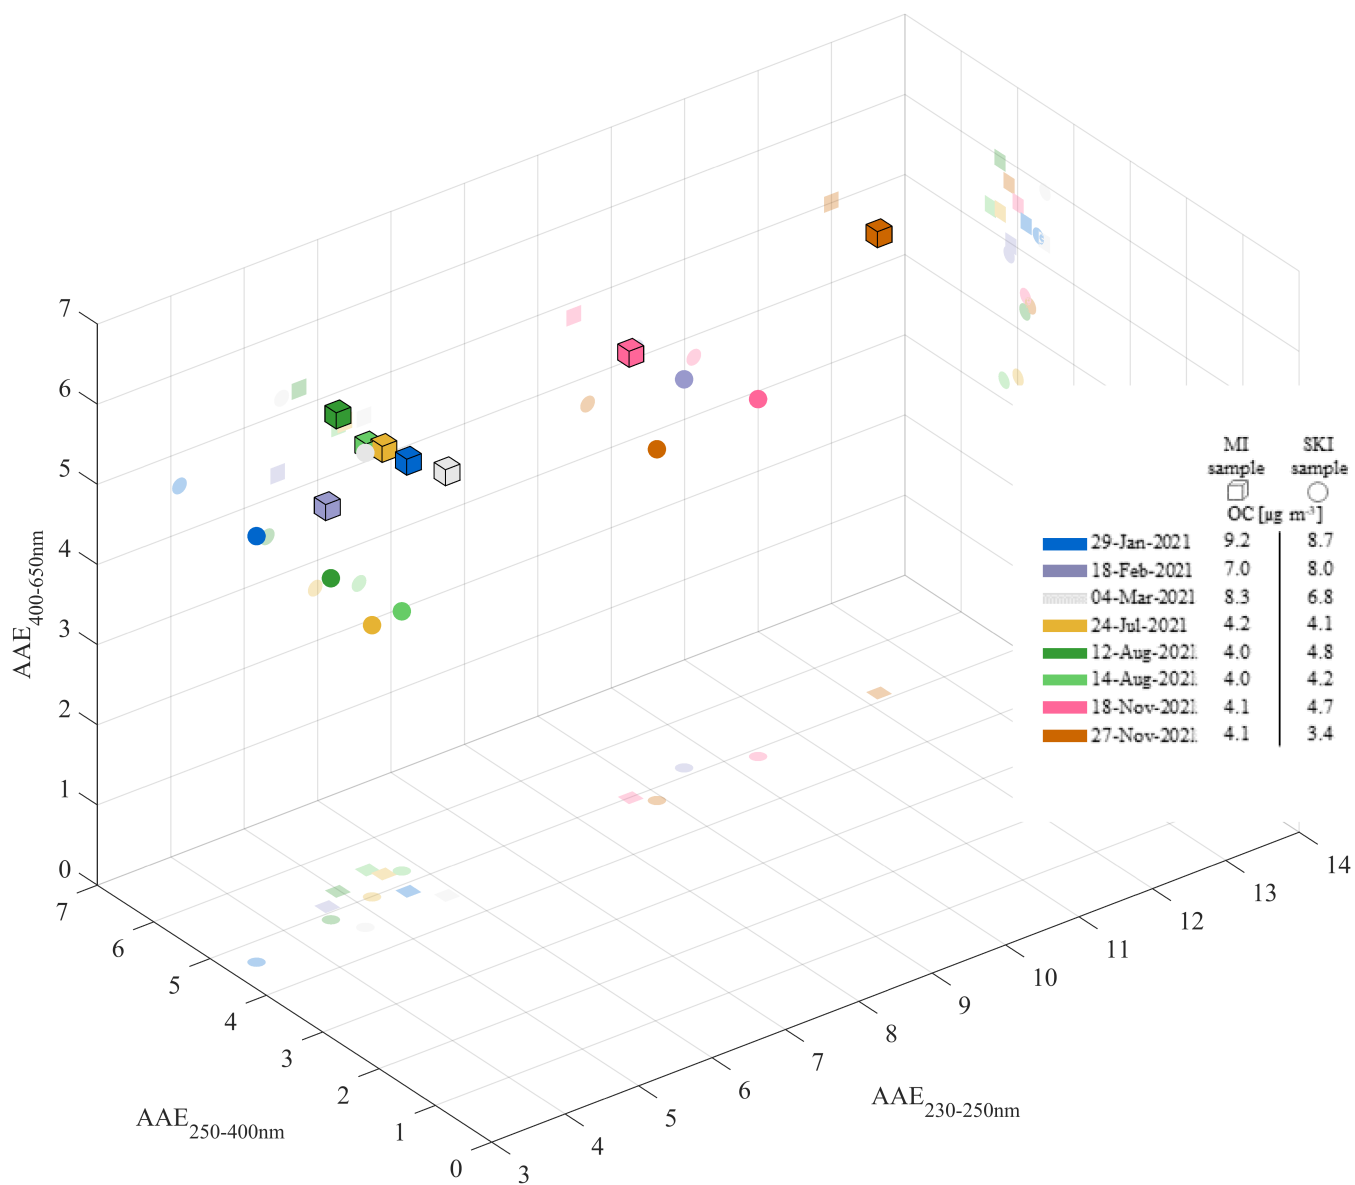

**Figure S26.** AAE for pairs of samples with similar OC concentrations and contribution to  $\text{PM}_{2.5}$ . OC concentrations are shown in the legend. Same colors indicates samples collected on the same days whereas the shape refers to the collection site: MI (cubes) or SKI (spheres). The marker projections make it easier to appreciate the distances between the points across the three planes, and they are oriented toward the reader.



**Table S1.** Workflow of the non-target software Compound Discoverer 3.3.2.31 - negative ionization mode data

| Processing node       | Parameter                                    | Settings                                                                                                                                                                                                                                                                                                                                |
|-----------------------|----------------------------------------------|-----------------------------------------------------------------------------------------------------------------------------------------------------------------------------------------------------------------------------------------------------------------------------------------------------------------------------------------|
| Select Spectra        | 1. Spectrum Properties Filter:               | Lower RT Limit: 0<br>Upper RT Limit: 16.5<br>First Scan: 0<br>Last Scan: 0<br>Ignore Specified Scans: (not specified)<br>Lowest Charge State: 0<br>Highest Charge State: 0<br>Min. Precursor Mass: 50 Da<br>Max. Precursor Mass: 5000 Da<br>Total Intensity Threshold: 10000<br>Minimum Peak Count: 1                                   |
|                       | 2. Scan Event Filters:                       | Mass Analyzer: Is FTMS<br>MS Order: Is MS2, MS1<br>Activation Type: Is HCD<br>Min. Collision Energy: 0<br>Max. Collision Energy: 1000<br>Scan Type: Any<br>Polarity Mode: Is -                                                                                                                                                          |
|                       | 3. Peak Filters:                             | S/N Threshold (FT-only): 5                                                                                                                                                                                                                                                                                                              |
|                       | 4. Replacements for Unrecognized Properties: | Unrecognized Charge Replacements: 1<br>Unrecognized Mass Analyzer Replacements: ITMS<br>Unrecognized MS Order Replacements: MS2<br>Unrecognized Activation Type Replacements: HCD<br>Unrecognized Polarity Replacements: -<br>Unrecognized MS Resolution@200 Replacements: 60000<br>Unrecognized MSn Resolution@200 Replacements: 30000 |
|                       | 5. General Settings:                         | Precursor Selection: Use MS1 Precursor<br>Use Isotope Pattern in Precursor Reevaluation: True<br>Provide Profile Spectra: Automatic<br>Store Chromatograms: False                                                                                                                                                                       |
| Align Retention Times | 1. General Settings:                         | Alignment Model: Adaptive curve<br>Alignment Fallback: Use Linear Model<br>Maximum Shift [min]: 0.2<br>Shift Reference File: True<br>Mass Tolerance: 5 ppm                                                                                                                                                                              |

*continued on next page*

| Processing node  | Parameter                     | Settings                                                                                                                                                                                                                                                               |
|------------------|-------------------------------|------------------------------------------------------------------------------------------------------------------------------------------------------------------------------------------------------------------------------------------------------------------------|
|                  |                               | Remove Outlier: True                                                                                                                                                                                                                                                   |
| Detect Compounds | 1. General Settings:          | Mass Tolerance [ppm]: 2 ppm<br>Min. Peak Intensity: 10000<br>Min. [#] Scans per Peak: 5<br>Use Most Intense Isotope Only: False                                                                                                                                        |
|                  | 2. Trace Detection:           | Max. Number of Gaps to Correct: 2<br>Min. Number of Adjacent Non-Zeros: 2                                                                                                                                                                                              |
|                  | 3. Peak Detection:            | Chromatographic S/N Threshold: 1.5<br>Remove Baseline: False<br>Gap Ratio Threshold: 0.35<br>Max. Peak Width [min]: 2<br>Min. Relative Valley Depth: 0.2                                                                                                               |
|                  | 4. Isotope Pattern Detection: | Group Isotopes for: Br, Cl<br>Use Peak Quality for Isotope Grouping: True<br>Filter out Features with Bad Peaks Only: True<br>Zig-Zag Index Threshold: 0.2<br>Jaggedness Threshold: 0.4<br>Modality Threshold: 0.9<br>Remove Potentially False Positive Isotopes: True |
|                  | 5. Compound Detection:        | Ions: [2M-H]-1; [M-H]-1<br>Base Ions: [M-H]-1<br>Remove Singlets: True                                                                                                                                                                                                 |
|                  | 6. AcquireX Settings:         | Detect Persistent Background Ions: False                                                                                                                                                                                                                               |
| Group Compounds  | 1. General Settings:          | Mass Tolerance: 2 ppm<br>RT Tolerance [min]: 0.2<br>Align Peaks: False<br>Preferred Ions: [M-H]-1<br>Area Integration: All Ions                                                                                                                                        |
|                  | 2. Peak Rating Contributions: | Area Contribution: 3<br>CV Contribution: 1<br>FWHM to Base Contribution: 5<br>Jaggedness Contribution: 5<br>Modality Contribution: 5<br>Zig-Zag Index Contribution: 5                                                                                                  |
|                  | 3. Peak Rating Filter:        |                                                                                                                                                                                                                                                                        |

*continued on next page*

| Processing node             | Parameter            | Settings                                                                                                                                                                                                                                                                                                                                                                                                                                                                                                                                                                                                                                                                                                                                                                                          |
|-----------------------------|----------------------|---------------------------------------------------------------------------------------------------------------------------------------------------------------------------------------------------------------------------------------------------------------------------------------------------------------------------------------------------------------------------------------------------------------------------------------------------------------------------------------------------------------------------------------------------------------------------------------------------------------------------------------------------------------------------------------------------------------------------------------------------------------------------------------------------|
| Fill Gaps                   |                      | Peak Rating Threshold: 4<br>Number of Files: 4                                                                                                                                                                                                                                                                                                                                                                                                                                                                                                                                                                                                                                                                                                                                                    |
|                             | 1. General Settings: | Mass Tolerance: 2 ppm<br>S/N Threshold: 1.5<br>Use Real Peak Detection: True<br>Apply Restrictive Gap Filling: True                                                                                                                                                                                                                                                                                                                                                                                                                                                                                                                                                                                                                                                                               |
| Mark Background Compounds   |                      |                                                                                                                                                                                                                                                                                                                                                                                                                                                                                                                                                                                                                                                                                                                                                                                                   |
|                             | 1. General Settings: | Max. Sample/Blank: 5<br>Max. Blank/Sample: 0<br>Hide Background: False                                                                                                                                                                                                                                                                                                                                                                                                                                                                                                                                                                                                                                                                                                                            |
| Assign Compound Annotations |                      |                                                                                                                                                                                                                                                                                                                                                                                                                                                                                                                                                                                                                                                                                                                                                                                                   |
|                             | 1. General Settings: | Mass Tolerance: 2 ppm                                                                                                                                                                                                                                                                                                                                                                                                                                                                                                                                                                                                                                                                                                                                                                             |
|                             | 2. Data Sources:     | Data Source #1: Predicted Compositions<br>Data Source #2: mzVault Search<br>Data Source #3: mzCloud Search<br>Data Source #4: ChemSpider Search                                                                                                                                                                                                                                                                                                                                                                                                                                                                                                                                                                                                                                                   |
|                             | 3. Scoring Rules:    | Use mzLogic: True<br>Use Spectral Distance: True<br>SFit Threshold: 20<br>SFit Range: 20                                                                                                                                                                                                                                                                                                                                                                                                                                                                                                                                                                                                                                                                                                          |
|                             | 4. Reprocessing:     | Clear Names: False                                                                                                                                                                                                                                                                                                                                                                                                                                                                                                                                                                                                                                                                                                                                                                                |
| Search Neutral Losses       |                      |                                                                                                                                                                                                                                                                                                                                                                                                                                                                                                                                                                                                                                                                                                                                                                                                   |
|                             | 1. General Settings: | C <sub>2</sub> H <sub>3</sub> (C2 H3, 27.02)<br>C <sub>2</sub> H <sub>3</sub> O <sub>2</sub> (C2 H3 O2, 59.01)<br>C <sub>2</sub> H <sub>4</sub> N (C2 H4 N, 42.03)<br>C <sub>2</sub> H <sub>5</sub> (C2 H5, 29.04)<br>C <sub>2</sub> H <sub>5</sub> O (C2 H5 O, 45.03)<br>C <sub>2</sub> H <sub>5</sub> OH (C2 H6 O, 46.04)<br>C <sub>2</sub> H <sub>6</sub> (C2 H6, 30.05)<br>C <sub>3</sub> H <sub>7</sub> (C3 H7, 43.05)<br>C <sub>4</sub> H <sub>10</sub> (C4 H10, 58.08)<br>C <sub>4</sub> H <sub>7</sub> (C4 H7, 55.05)<br>C <sub>4</sub> H <sub>8</sub> (C4 H8, 56.06)<br>C <sub>4</sub> H <sub>9</sub> (C4 H9, 57.07)<br>C <sub>6</sub> H <sub>6</sub> (C6 H6, 78.05)<br>C <sub>6</sub> H <sub>6</sub> CH <sub>3</sub> (C7 H9, 93.07)<br>C <sub>6</sub> H <sub>6</sub> O (C6 H6 O, 94.04) |

*continued on next page*

| Processing node | Parameter                               | Settings                                                                                                                                                                 |
|-----------------|-----------------------------------------|--------------------------------------------------------------------------------------------------------------------------------------------------------------------------|
|                 |                                         | C <sub>6</sub> H <sub>7</sub> N (C6 H7 N, 93.06)                                                                                                                         |
|                 |                                         | CH <sub>2</sub> (C H2, 14.02)                                                                                                                                            |
|                 |                                         | CH <sub>2</sub> C=O (C2 H2 O, 42.01)                                                                                                                                     |
|                 |                                         | CH <sub>3</sub> (C H3, 15.02)                                                                                                                                            |
|                 |                                         | CH <sub>3</sub> CH=CH <sub>2</sub> (C3 H6, 42.05)                                                                                                                        |
|                 |                                         | CH <sub>3</sub> CO (C2 H3 O, 43.02)                                                                                                                                      |
|                 |                                         | CH <sub>3</sub> COOH (C2 H4 O2, 60.02)                                                                                                                                   |
|                 |                                         | CH <sub>3</sub> O (C H3 O, 31.02)                                                                                                                                        |
|                 |                                         | CH <sub>3</sub> OH (C H4 O, 32.03)                                                                                                                                       |
|                 |                                         | CH <sub>4</sub> (C H4, 16.03)                                                                                                                                            |
|                 |                                         | CH <sub>5</sub> O (C H5 O, 33.03)                                                                                                                                        |
|                 |                                         | CO (C O, 27.99)                                                                                                                                                          |
|                 |                                         | CO <sub>2</sub> (C O2, 43.99)                                                                                                                                            |
|                 |                                         | CONH <sub>2</sub> (C H2 N O, 44.01)                                                                                                                                      |
|                 |                                         | H <sub>2</sub> C=CH <sub>2</sub> (C2 H4, 28.03)                                                                                                                          |
|                 |                                         | H <sub>2</sub> C=O (C H2 O, 30.01)                                                                                                                                       |
|                 |                                         | H <sub>2</sub> O (H2 O, 18.01)                                                                                                                                           |
|                 |                                         | H <sub>2</sub> S (H2 S, 33.99)                                                                                                                                           |
|                 |                                         | H <sub>2</sub> SO <sub>4</sub> (H2 O4 S, 97.97)                                                                                                                          |
|                 |                                         | HCCH (C2 H2, 26.02)                                                                                                                                                      |
|                 |                                         | HCl (H Cl, 35.98)                                                                                                                                                        |
|                 |                                         | HCN (C H N, 27.01)                                                                                                                                                       |
|                 |                                         | HNO <sub>3</sub> (H N O3, 63.00)                                                                                                                                         |
|                 |                                         | HS (H S, 32.98)                                                                                                                                                          |
|                 |                                         | HSO <sub>4</sub> (H O4 S, 96.96)                                                                                                                                         |
|                 |                                         | NH <sub>3</sub> (H3 N, 17.03)                                                                                                                                            |
|                 |                                         | NO (N O, 30.00)                                                                                                                                                          |
|                 |                                         | NO <sub>2</sub> (N O2, 45.99)                                                                                                                                            |
|                 |                                         | NO <sub>3</sub> (N O3, 61.99)                                                                                                                                            |
|                 |                                         | OH (H O, 17.00)                                                                                                                                                          |
|                 |                                         | S (S, 31.97)                                                                                                                                                             |
|                 |                                         | SO (O S, 47.97)                                                                                                                                                          |
|                 |                                         | SO <sub>2</sub> (O2 S, 63.96)                                                                                                                                            |
|                 | 2. High Acc. Mass<br>Tolerance: 2.5 mmu |                                                                                                                                                                          |
|                 | 3. Low Acc. Mass<br>Tolerance: 0.5 Da   |                                                                                                                                                                          |
|                 | 4. S/N Threshold: 3                     |                                                                                                                                                                          |
|                 | 5. Use DIA Scans for<br>Search: False   |                                                                                                                                                                          |
| Search mzCloud  | 1. General Settings:                    | Compound Classes: All<br>Precursor Mass Tolerance: 5 ppm<br>FT Fragment Mass Tolerance: 5 ppm<br>IT Fragment Mass Tolerance: 0.4 Da<br>Library: Autoprocessed; Reference |

*continued on next page*

| Processing node      | Parameter               | Settings                                                                                                                                                                                                                                                                                                                  |
|----------------------|-------------------------|---------------------------------------------------------------------------------------------------------------------------------------------------------------------------------------------------------------------------------------------------------------------------------------------------------------------------|
|                      |                         | Post Processing: Recalibrated<br>Max. # Results: 10<br>Annotate Matching Fragments: False<br>Search MSn Tree: False                                                                                                                                                                                                       |
|                      | 2. DDA Search:          | Identity Search: HighChem HighRes<br>Match Activation Type: True<br>Match Activation Energy: Match with Tolerance<br>Activation Energy Tolerance: 20<br>Apply Intensity Threshold: True<br>Similarity Search: Similarity Reverse<br>Match Factor Threshold: 60                                                            |
|                      | 3. DIA Search:          | Use DIA Scans for Search: False<br>Max. Isolation Width [Da]: 500<br>Match Activation Type: False<br>Match Activation Energy: Any<br>Activation Energy Tolerance: 100<br>Apply Intensity Threshold: False<br>Match Factor Threshold: 20                                                                                   |
| Predict Compositions | 1. Prediction Settings: | Mass Tolerance: 2 ppm<br>Min. Element Counts: C H<br>Max. Element Counts: C <sub>90</sub> H <sub>190</sub> Br <sub>3</sub> Cl <sub>4</sub> N <sub>4</sub> O <sub>20</sub> P S <sub>3</sub><br>Min. RDBE: 0<br>Max. RDBE: 40<br>Min. H/C: 0.1<br>Max. H/C: 3.5<br>Max. # Candidates: 10<br>Max. # Internal Candidates: 200 |
|                      | 2. Pattern Matching:    | Intensity Tolerance [%]: 10<br>Intensity Threshold [%]: 0.1<br>S/N Threshold: 3<br>Min. Spectral Fit [%]: 30<br>Min. Pattern Cov. [%]: 90<br>Use Dynamic Recalibration: True                                                                                                                                              |
|                      | 3. Fragments Matching:  | Use Fragments Matching: True<br>Mass Tolerance: 10 ppm<br>S/N Threshold: 5                                                                                                                                                                                                                                                |
| Search mzVault       | 1. Search Settings:     | mzVault Library: <i>add libraries created with mzVault</i><br>Max. # Results: 10<br>Match Factor Threshold: 50                                                                                                                                                                                                            |

*continued on next page*

| Processing node | Parameter | Settings                                                                                                                                                                                                                                                                                                                                                                                                                                                                                       |
|-----------------|-----------|------------------------------------------------------------------------------------------------------------------------------------------------------------------------------------------------------------------------------------------------------------------------------------------------------------------------------------------------------------------------------------------------------------------------------------------------------------------------------------------------|
|                 |           | Search Algorithm: HighChem HighRes<br>Match Analyzer Type: True<br>IT Fragment Mass Tolerance: 0.4 Da<br>FT Fragment Mass Tolerance: 10 ppm<br>Use Retention Time: True<br>Precursor Mass Tolerance: 10 ppm<br>Apply Intensity Threshold: True<br>Match Ionization Method: True<br>Ion Activation Energy Tolerance: 20<br>Match Ion Activation Energy: Match with Tolerance<br>Match Ion Activation Type: True<br>Compound Classes: All<br>Remove Precursor Ion: True<br>RT Tolerance [min]: 3 |

**Table S2.** Workflow of the non-target software Compound Discoverer 3.3.2.31 - positive ionization mode data

| Processing node | Parameter                                    | Settings                                                                                                                                                                                                                                                                                                                                |
|-----------------|----------------------------------------------|-----------------------------------------------------------------------------------------------------------------------------------------------------------------------------------------------------------------------------------------------------------------------------------------------------------------------------------------|
| Select Spectra  | 1. Spectrum Properties                       |                                                                                                                                                                                                                                                                                                                                         |
|                 | Filter:                                      | Lower RT Limit: 0<br>Upper RT Limit: 16.5<br>First Scan: 0<br>Last Scan: 0<br>Ignore Specified Scans: (not specified)<br>Lowest Charge State: 0<br>Highest Charge State: 0<br>Min. Precursor Mass: 50 Da<br>Max. Precursor Mass: 5000 Da<br>Total Intensity Threshold: 10000<br>Minimum Peak Count: 1                                   |
|                 | 2. Scan Event Filters:                       | Mass Analyzer: Is FTMS<br>MS Order: Is MS2, MS1<br>Activation Type: (not specified)<br>Min. Collision Energy: 0<br>Max. Collision Energy: 1000<br>Scan Type: Any<br>Polarity Mode: Is +<br>MS1 Mass Range: (not specified)                                                                                                              |
|                 | FAIMS CV: (not specified)                    | 3. Peak Filters:                                                                                                                                                                                                                                                                                                                        |
|                 |                                              | S/N Threshold (FT-only): 1.5                                                                                                                                                                                                                                                                                                            |
|                 | 4. Replacements for Unrecognized Properties: | Unrecognized Charge Replacements: 1<br>Unrecognized Mass Analyzer Replacements: ITMS<br>Unrecognized MS Order Replacements: MS2<br>Unrecognized Activation Type Replacements: CID<br>Unrecognized Polarity Replacements: +<br>Unrecognized MS Resolution@200 Replacements: 60000<br>Unrecognized MSn Resolution@200 Replacements: 30000 |
|                 | 5. General Settings:                         | Precursor Selection: Use MS1 Precursor<br>Use Isotope Pattern in Precursor Reevaluation: True<br>Provide Profile Spectra: Automatic<br>Store Chromatograms: False                                                                                                                                                                       |
|                 | Align Retention Times                        |                                                                                                                                                                                                                                                                                                                                         |
|                 | 1. General Settings:                         | Alignment Model: Adaptive curve<br>Alignment Fallback: Use Linear Model<br>Maximum Shift [min]: 0.2<br>Shift Reference File: True                                                                                                                                                                                                       |

*continued on next page*

| Processing node  | Parameter                     | Settings                                                                                                                                                                                                                                                               |
|------------------|-------------------------------|------------------------------------------------------------------------------------------------------------------------------------------------------------------------------------------------------------------------------------------------------------------------|
| Detect Compounds |                               | Mass Tolerance: 5 ppm<br>Remove Outlier: True                                                                                                                                                                                                                          |
|                  | 1. General Settings:          | Mass Tolerance [ppm]: 2 ppm<br>Min. Peak Intensity: 100000<br>Min. [#] Scans per Peak: 5<br>Use Most Intense Isotope Only: True                                                                                                                                        |
|                  | 2. Trace Detection:           | Max. Number of Gaps to Correct: 2<br>Min. Number of Adjacent Non-Zeros: 2                                                                                                                                                                                              |
|                  | 3. Peak Detection:            | Chromatographic S/N Threshold: 1.5<br>Remove Baseline: False<br>Gap Ratio Threshold: 0.35<br>Max. Peak Width [min]: 1<br>Min. Relative Valley Depth: 0.1                                                                                                               |
|                  | 4. Isotope Pattern Detection: | Group Isotopes for: Br, Cl<br>Use Peak Quality for Isotope Grouping: True<br>Filter out Features with Bad Peaks Only: True<br>Zig-Zag Index Threshold: 0.2<br>Jaggedness Threshold: 0.4<br>Modality Threshold: 0.9<br>Remove Potentially False Positive Isotopes: True |
|                  | 5. Compound Detection:        | Ions: [2M+H]+1; [M+H]+1; [2M+Na]+1; [M+Na]+1<br>Base Ions: [M+H]+1<br>Remove Singlets: True                                                                                                                                                                            |
|                  | 6. AcquireX Settings:         | Detect Persistent Background Ions: False                                                                                                                                                                                                                               |
| Group Compounds  | 1. General Settings:          | Mass Tolerance: 2 ppm<br>RT Tolerance [min]: 0.2<br>Align Peaks: False<br>Preferred Ions: [M+H]+1; [M+Na]+1<br>Area Integration: All Ions                                                                                                                              |
|                  | 2. Peak Rating Contributions: | Area Contribution: 3<br>CV Contribution: 1<br>FWHM to Base Contribution: 5<br>Jaggedness Contribution: 5<br>Modality Contribution: 5<br>Zig-Zag Index Contribution: 5                                                                                                  |

*continued on next page*

| Processing node             | Parameter              | Settings                                                                                                                                                                                                                                                                                        |
|-----------------------------|------------------------|-------------------------------------------------------------------------------------------------------------------------------------------------------------------------------------------------------------------------------------------------------------------------------------------------|
| Fill Gaps                   | 3. Peak Rating Filter: | Peak Rating Threshold: 4<br>Number of Files: 4                                                                                                                                                                                                                                                  |
|                             | 1. General Settings:   | Mass Tolerance: 2 ppm<br>S/N Threshold: 1.5<br>Use Real Peak Detection: True<br>Apply Restrictive Gap Filling: True                                                                                                                                                                             |
| Mark Background Compounds   | 1. General Settings:   | Max. Sample/Blank: 5<br>Max. Blank/Sample: 0<br>Hide Background: False                                                                                                                                                                                                                          |
|                             | 1. General Settings:   | Mass Tolerance: 2 ppm                                                                                                                                                                                                                                                                           |
| Assign Compound Annotations | 2. Data Sources:       | Data Source #1: Predicted Compositions<br>Data Source #2: mzCloud Search                                                                                                                                                                                                                        |
|                             | 3. Scoring Rules:      | Use mzLogic: True<br>Use Spectral Distance: True<br>SFit Threshold: 20<br>SFit Range: 20                                                                                                                                                                                                        |
|                             | 4. Reprocessing:       | Clear Names: False                                                                                                                                                                                                                                                                              |
|                             | 1. General Settings:   | Compound Classes: All<br>Precursor Mass Tolerance: 5 ppm<br>FT Fragment Mass Tolerance: 5 ppm<br>IT Fragment Mass Tolerance: 0.4 Da<br>Library: Autoprocessed; Reference<br>Post Processing: Recalibrated<br>Max. # Results: 10<br>Annotate Matching Fragments: False<br>Search MSn Tree: False |
| Search mzCloud              | 2. DDA Search:         | Identity Search: HighChem HighRes<br>Match Activation Type: True<br>Match Activation Energy: Match with Tolerance<br>Activation Energy Tolerance: 20<br>Apply Intensity Threshold: True<br>Similarity Search: Similarity Forward                                                                |

*continued on next page*

| Processing node       | Parameter            | Settings                                                                                                                                                                                                                                                                                                                                                                                                                                                                                                                                                                                                                                                                                                                                                                                                                                                                                                                                                                                                                                                                                                                                                                                                                                                                                                                                                                                                                                                                                                                                                                                                      |
|-----------------------|----------------------|---------------------------------------------------------------------------------------------------------------------------------------------------------------------------------------------------------------------------------------------------------------------------------------------------------------------------------------------------------------------------------------------------------------------------------------------------------------------------------------------------------------------------------------------------------------------------------------------------------------------------------------------------------------------------------------------------------------------------------------------------------------------------------------------------------------------------------------------------------------------------------------------------------------------------------------------------------------------------------------------------------------------------------------------------------------------------------------------------------------------------------------------------------------------------------------------------------------------------------------------------------------------------------------------------------------------------------------------------------------------------------------------------------------------------------------------------------------------------------------------------------------------------------------------------------------------------------------------------------------|
|                       |                      | Match Factor Threshold: 80                                                                                                                                                                                                                                                                                                                                                                                                                                                                                                                                                                                                                                                                                                                                                                                                                                                                                                                                                                                                                                                                                                                                                                                                                                                                                                                                                                                                                                                                                                                                                                                    |
|                       | 3. DIA Search:       | Use DIA Scans for Search: False<br>Max. Isolation Width [Da]: 500<br>Match Activation Type: False<br>Match Activation Energy: Any<br>Activation Energy Tolerance: 100<br>Apply Intensity Threshold: False<br>Match Factor Threshold: 20                                                                                                                                                                                                                                                                                                                                                                                                                                                                                                                                                                                                                                                                                                                                                                                                                                                                                                                                                                                                                                                                                                                                                                                                                                                                                                                                                                       |
| Search Neutral Losses | 1. General Settings: | C <sub>2</sub> H <sub>3</sub> (C2 H3, 27.02)<br>C <sub>2</sub> H <sub>3</sub> O <sub>2</sub> (C2 H3 O2, 59.01)<br>C <sub>2</sub> H <sub>4</sub> N (C2 H4 N, 42.03)<br>C <sub>2</sub> H <sub>5</sub> (C2 H5, 29.04)<br>C <sub>2</sub> H <sub>5</sub> O (C2 H5 O, 45.03)<br>C <sub>2</sub> H <sub>5</sub> OH (C2 H6 O, 46.04)<br>C <sub>2</sub> H <sub>6</sub> (C2 H6, 30.05)<br>C <sub>3</sub> H <sub>7</sub> (C3 H7, 43.05)<br>C <sub>4</sub> H <sub>10</sub> (C4 H10, 58.08)<br>C <sub>4</sub> H <sub>7</sub> (C4 H7, 55.05)<br>C <sub>4</sub> H <sub>8</sub> (C4 H8, 56.06)<br>C <sub>4</sub> H <sub>9</sub> (C4 H9, 57.07)<br>C <sub>6</sub> H <sub>6</sub> (C6 H6, 78.05)<br>C <sub>6</sub> H <sub>6</sub> CH <sub>3</sub> (C7 H9, 93.07)<br>C <sub>6</sub> H <sub>6</sub> O (C6 H6 O, 94.04)<br>C <sub>6</sub> H <sub>7</sub> N (C6 H7 N, 93.06)<br>CH <sub>2</sub> (C H2, 14.02)<br>CH <sub>2</sub> C=O (C2 H2 O, 42.01)<br>CH <sub>3</sub> (C H3, 15.02)<br>CH <sub>3</sub> CH=CH <sub>2</sub> (C3 H6, 42.05)<br>CH <sub>3</sub> CO (C2 H3 O, 43.02)<br>CH <sub>3</sub> COOH (C2 H4 O2, 60.02)<br>CH <sub>3</sub> O (C H3 O, 31.02)<br>CH <sub>3</sub> OH (C H4 O, 32.03)<br>CH <sub>4</sub> (C H4, 16.03)<br>CH <sub>5</sub> O (C H5 O, 33.03)<br>CO (C O, 27.99)<br>CO <sub>2</sub> (C O2, 43.99)<br>CONH <sub>2</sub> (C H2 N O, 44.01)<br>H <sub>2</sub> C=CH <sub>2</sub> (C2 H4, 28.03)<br>H <sub>2</sub> C=O (C H2 O, 30.01)<br>H <sub>2</sub> O (H2 O, 18.01)<br>H <sub>2</sub> S (H2 S, 33.99)<br>H <sub>2</sub> SO <sub>4</sub> (H2 O4 S, 97.97)<br>HCCH (C2 H2, 26.02)<br>HCl (H Cl, 35.98) |
|                       |                      | <i>continued on next page</i>                                                                                                                                                                                                                                                                                                                                                                                                                                                                                                                                                                                                                                                                                                                                                                                                                                                                                                                                                                                                                                                                                                                                                                                                                                                                                                                                                                                                                                                                                                                                                                                 |

| Processing node      | Parameter                                                                                                                                        | Settings                                                                                                                                                                                                                                                                                                                                                                                              |
|----------------------|--------------------------------------------------------------------------------------------------------------------------------------------------|-------------------------------------------------------------------------------------------------------------------------------------------------------------------------------------------------------------------------------------------------------------------------------------------------------------------------------------------------------------------------------------------------------|
|                      |                                                                                                                                                  | HCN (C H N, 27.01)<br>HNO <sub>3</sub> (H N O <sub>3</sub> , 63.00)<br>HS (H S, 32.98)<br>HSO <sub>4</sub> (H O <sub>4</sub> S, 96.96)<br>NH <sub>3</sub> (H <sub>3</sub> N, 17.03)<br>NO (N O, 30.00)<br>NO <sub>2</sub> (N O <sub>2</sub> , 45.99)<br>NO <sub>3</sub> (N O <sub>3</sub> , 61.99)<br>OH (H O, 17.00)<br>S (S, 31.97)<br>SO (O S, 47.97)<br>SO <sub>2</sub> (O <sub>2</sub> S, 63.96) |
|                      | 2. High Acc. Mass<br>Tolerance: 2.5 mmu<br>3. Low Acc. Mass<br>Tolerance: 0.5 Da<br>4. S/N Threshold: 3<br>5. Use DIA Scans for<br>Search: False |                                                                                                                                                                                                                                                                                                                                                                                                       |
| Predict Compositions | 1. Prediction Settings:                                                                                                                          | Mass Tolerance: 2 ppm<br>Min. Element Counts: C H<br>Max. Element Counts: C <sub>90</sub> H <sub>190</sub> Br <sub>3</sub> Cl <sub>4</sub> N <sub>4</sub> O <sub>20</sub> S <sub>3</sub> P<br>Min. RDBE: 0<br>Max. RDBE: 40<br>Min. H/C: 0.1<br>Max. H/C: 3.5<br>Max. # Candidates: 10<br>Max. # Internal Candidates: 200                                                                             |
|                      | 2. Pattern Matching:                                                                                                                             | Intensity Tolerance [%]: 10<br>Intensity Threshold [%]: 0.1<br>S/N Threshold: 3<br>Min. Spectral Fit [%]: 30<br>Min. Pattern Cov. [%]: 90<br>Use Dynamic Recalibration: True                                                                                                                                                                                                                          |
|                      | 3. Fragments Matching:                                                                                                                           | Use Fragments Matching: True<br>Mass Tolerance: 10 ppm<br>S/N Threshold: 5                                                                                                                                                                                                                                                                                                                            |

## References

Amante, C. and Eakins, B. W.: ETOPO1 1 Arc-Minute Global Relief Model: Procedures Data Sources and Analysis, <https://doi.org/doi:10.7289/V5C8276M>, 2009.
